# Supplementary material
Source: PubMed Central journal article supplement (PMC4839266)
Supplement: NIHMS727630-supplement-Supplementary_Info.pdf [file NIHMS727630-supplement-Supplementary_Info.pdf]

Supplementary Material for:

***Targeted metagenomics: finding rare tryptophan dimer natural products in the environment.***

Fang-Yuan Chang, Melinda A. Ternei, Paula Y. Calle, and Sean F. Brady\*  
Laboratory of Genetically Encoded Small Molecules, The Rockefeller University, Howard Hughes Medical Institute,  
1230 York Avenue, New York, NY 10065.

RECEIVED DATE (automatically inserted by publisher); sbrady@rockefeller.edu

Supplementary Material Table of Contents

|                                                                                     |    |
|-------------------------------------------------------------------------------------|----|
| Figure S1. CLUSTALW-based phylogenetic tree of TD environmental sequence tags. .... | S2 |
| Figure S2. Annotation of the <i>hys</i> gene cluster. ....                          | S3 |
| Figure S3. Annotation of the <i>red</i> gene cluster. ....                          | S4 |
| Figure S4. NMR spectra of compound 1. ....                                          | S5 |
| Figure S5. ORTEP diagram of compound 2. ....                                        | S6 |
| Figure S6. NMR spectra of compound 2. ....                                          | S7 |
| Table S1. PCR primer list. ....                                                     | S8 |
| Table S2. Tryptophan dimer sequence tag list. ....                                  | S9 |

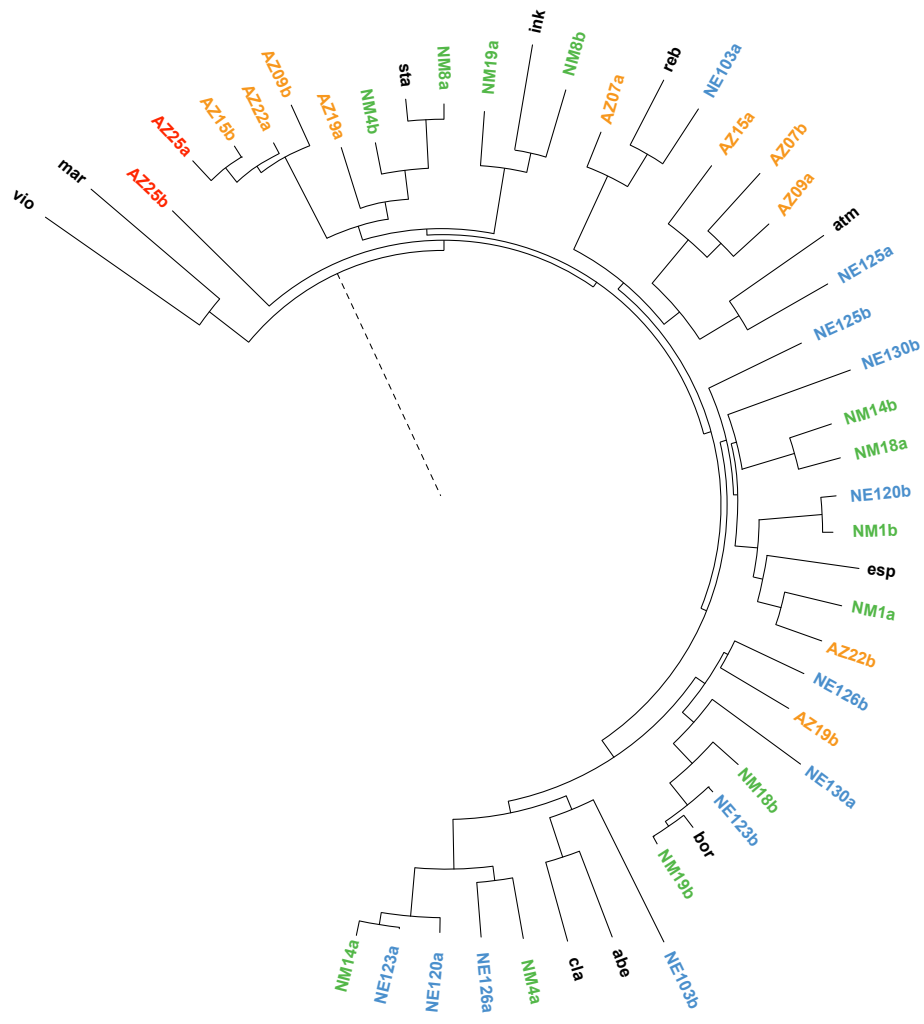

**Figure S1. CLUSTALW-based phylogenetic tree of TD environmental sequence tags.** CPAS gene sequence tags from Arizona (AZ; orange), New Mexico (NM; green), and New England (NE; blue) soil samples are aligned with the knowns (black). The two tags (AZ25a, AZ25b) investigated in this study are highlighted in red.

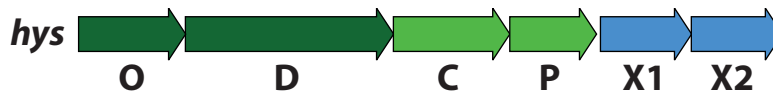

| N  | Gene   | Size (aa) | Homolog                                   | ID/SM (%) | Origin                                  | Accession Number |
|----|--------|-----------|-------------------------------------------|-----------|-----------------------------------------|------------------|
| 1  | orf-25 | 645       | sensor kinase                             | 48/62     | Rhodococcus wratislaviensis NBRC 100605 | GAF48609.1       |
| 2  | orf-24 | 225       | LuxR family transcriptional regulator     | 77/88     | Rhodococcus opacus                      | WP_025433290.1   |
| 3  | orf-23 | 322       | dehydrogenase                             | 78/85     | Pseudonocardia acaciae                  | WP_028921473.1   |
| 4  | orf-22 | 134       | transcriptional regulator                 | 71/84     | Pseudonocardia dioxanivorans            | WP_013677698.1   |
| 5  | orf-21 | 286       | RNA ligase                                | 78/84     | Streptomyces viridochromogenes          | WP_003995917.1   |
| 6  | orf-20 | 140       | archease                                  | 59/66     | Verrucospora maris                      | WP_013733957.1   |
| 7  | orf-19 | 173       | transporter                               | 35/52     | Nitrolancea hollandica                  | WP_008477262.1   |
| 8  | orf-18 | 372       | MFS transporter                           | 65/79     | Myxococcus xanthus                      | WP_020478826.1   |
| 9  | orf-17 | 166       | endonuclease                              | 71/80     | Pseudonocardia asaccharolytica          | WP_028931995.1   |
| 10 | orf-16 | 191       | alcohol dehydrogenase                     | 32/41     | Mycobacterium cosmeticum                | CDO08914.1       |
| 11 | orf-15 | 198       | reductase                                 | 74/81     | Actinokineospora enzanensis             | WP_018687140.1   |
| 12 | orf-14 | 402       | FAD-dependent oxidoreductase              | 72/81     | Amycolatopsis mediterranei              | WP_013226545.1   |
| 13 | orf-13 | 119       | hypothetical protein                      | 60/75     | Nocardia brasiliensis NBRC 14402        | GAJ84167.1       |
| 14 | orf-12 | 215       | hypothetical protein                      | 54/63     | Micromonospora sp. ATCC 39149           | WP_007071715.1   |
| 15 | orf-11 | 123       | NADH-quinone oxidoreductase               | 77/87     | Pseudonocardia dioxanivorans            | WP_013678831.1   |
| 16 | orf-10 | 331       | hypothetical protein                      | 40/51     | Saccharomonospora xinjiangensis         | WP_006240734.1   |
| 17 | orf-9  | 249       | NADH dehydrogenase                        | 79/86     | Pseudonocardia dioxanivorans            | WP_013678829.1   |
| 18 | orf-8  | 188       | NADH-ubiquinone oxidoreductase            | 71/78     | Streptomyces afghaniensis               | WP_020275586.1   |
| 19 | orf-7  | 100       | NADH-ubiquinone oxidoreductase            | 74/90     | Actinomadura madurae                    | WP_021596654.1   |
| 20 | orf-6  | 610       | NADH dehydrogenase                        | 64/72     | Streptomyces sp. NRRL WC-3641           | WP_031120050.1   |
| 21 | orf-5  | 502       | oxidoreductase                            | 73/81     | Streptomyces sp. NRRL F-2305            | WP_030835849.1   |
| 22 | orf-4  | 476       | NADH-quinone oxidoreductase               | 60/70     | Streptomyces sp. NRRL S-37              | WP_030871967.1   |
| 23 | orf-3  | 223       | none                                      |           |                                         |                  |
| 24 | orf-2  | 287       | RNA polymerase sigma factor               | 56/74     | Kutzneria albida                        | WP_025359630.1   |
| 25 | orf-1  | 260       | methyltransferase                         | 37/49     | Microclunatus phosphovorus              | WP_013864415.1   |
| 26 | O      | 490       | indole-3-pyruvic acid imine synthase StaO | 51/64     | Streptomyces sp. NRRL WC-3719           | WP_031128187.1   |
| 27 | D      | 954       | chromopyrrolic acid synthase StaD         | 52/62     | uncultured bacterium                    | AHE14639.1       |
| 28 | C      | 533       | FAD-binding monooxygenase StaC            | 67/77     | Streptomyces sp. TP-A0274               | BAF47693.1       |
| 29 | P      | 397       | cytochrome P450 StaP                      | 57/68     | Actinomadura mellioura                  | ABC02792.1       |
| 30 | X1     | 417       | cytochrome P450 hydroxylase               | 46/61     | uncultured bacterium                    | AHE14835.1       |
| 31 | X2     | 417       | cytochrome P450 hydroxylase               | 47/64     | uncultured bacterium                    | AHE14835.1       |
| 32 | orf+1  | 140       | cyclase                                   | 50/63     | Frankia sp. QA3                         | WP_009739180.1   |
| 33 | orf+2  | 175       | cyclase                                   | 58/68     | Streptosporangium amethystogenes        | WP_030923309.1   |
| 34 | orf+3  | 379       | alcohol dehydrogenase                     | 76/86     | Streptosporangium amethystogenes        | WP_030923305.1   |
| 35 | orf+4  | 243       | cytochrome C oxidase                      | 77/91     | Actinoalloteichus cyanogriseus          | WP_030104074.1   |
| 36 | orf+5  | 364       | membrane protein                          | 30/50     | Xenococcus sp. PCC 7305                 | WP_006512167.1   |
| 37 | orf+6  | 440       | dehydratase                               | 42/55     | Oceanicola granulosus                   | WP_007253650.1   |
| 38 | orf+7  | 266       | dehydratase                               | 34/55     | Mesorhizobium ciceri                    | WP_024505168.1   |

**Figure S2. Annotation of the *hys* gene cluster.** Tryptophan dimer gene cluster found in clone P204 (GenBank accession: KP274855). The annotation is based on BLASTP (NCBI) homology search of translated genes predicted by FGENESB.

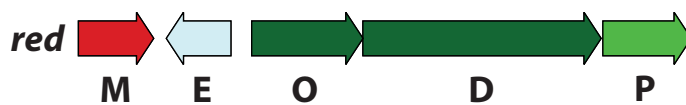

| N  | Gene   | Size (aa) | Homolog                                            | ID/SM (%) | Origin                              | Accession Number |
|----|--------|-----------|----------------------------------------------------|-----------|-------------------------------------|------------------|
| 1  | orf-2  | 110       | flavodoxin                                         | 75/85     | Streptomyces filamentosus           | WP_006129488.1   |
| 2  | orf-1  | 107       | multidrug transporter                              | 71/84     | Amycolatopsis nigrescens            | WP_020667160.1   |
| 3  | M      | 344       | methyltransferase                                  | 64/75     | Streptomyces mobaraensis            | WP_004943262.1   |
| 4  | E      | 295       | imine reductase (6-phosphogluconate dehydrogenase) | 66/74     | Streptomyces mobaraensis            | WP_004937742.1   |
| 5  | O      | 509       | indole-3-pyruvic acid imine synthase StaO          | 66/73     | Streptomyces mobaraensis            | WP_004942121.1   |
| 6  | D      | 1091      | chromopyrrolic acid synthase StaD                  | 57/70     | uncultured bacterium                | AHE14826.1       |
| 7  | P      | 388       | cytochrome P450 StaP                               | 65/73     | Streptomyces mobaraensis            | WP_004942127.1   |
| 8  | T      | 399       | ABC transporter                                    | 57/67     | Saccharopolyspora erythraea         | WP_011874711.1   |
| 9  | orf+1  | 209       | tryptophan 2,3-dioxygenase                         | 42/51     | Amycolatopsis nigrescens            | WP_020673272.1   |
| 10 | orf+2  | 221       | putative membrane protein                          | 78/84     | Streptomyces aurantiacus            | WP_016638623.1   |
| 11 | orf+3  | 139       | ketosteroid isomerase                              | 87/92     | Streptomyces afghaniensis           | WP_020273417.1   |
| 12 | orf+4  | 448       | putative glucarate dehydratase                     | 93/96     | Streptomyces ambofaciens ATCC 23877 | CAJ89466.1       |
| 13 | orf+5  | 156       | gluconate permease                                 | 58/63     | Streptomyces ambofaciens ATCC 23877 | CAJ89467.1       |
| 14 | orf+6  | 92        | hypothetical protein                               | 77/86     | Streptomyces chartreusis            | WP_010040441.1   |
| 15 | orf+7  | 587       | peptidase S8                                       | 84/88     | Streptomyces venezuelae             | WP_015038177.1   |
| 16 | orf+8  | 439       | protease                                           | 71/80     | Streptomyces niveus NCIMB 11891     | EST31045.1       |
| 17 | orf+9  | 692       | ABC transporter                                    | 90/95     | Streptomyces sp. CNB091             | WP_018956698.1   |
| 18 | orf+10 | 396       | transcriptional regulator                          | 57/71     | Streptomyces niveus NCIMB 11891     | EST33937.1       |
| 19 | orf+11 | 67        | hypothetical protein                               | 63/67     | Streptomyces niveus                 | WP_023536416.1   |
| 20 | orf+12 | 582       | asparagine synthase                                | 55/64     | Streptomyces niveus                 | WP_031228349.1   |
| 21 | orf+13 | 214       | hypothetical protein                               | 49/60     | Streptomyces niveus                 | WP_031228351.1   |
| 22 | orf+14 | 43        | none                                               |           |                                     |                  |
| 23 | orf+15 | 274       | phosphoesterase                                    | 71/77     | Streptomyces sp. Mg1                | WP_008737016.1   |
| 24 | orf+16 | 651       | diacylglycerol kinase                              | 47/59     | Streptomyces griseus                | WP_003967271.1   |
| 25 | orf+17 | 312       | ribonuclease                                       | 53/67     | Streptomyces sp. FxanaC1            | WP_018090524.1   |
| 26 | orf+18 | 210       | hypothetical protein                               | 40/59     | Cellulomonas massiliensis           | WP_019136883.1   |
| 27 | orf+19 | 288       | G-D-S-L family lipolytic protein                   | 70/80     | Streptomyces pratensis              | WP_014152362.1   |

**Figure S3. Annotation of the *red* gene cluster.** Tryptophan dimer gene cluster found in clone P121 (GenBank accession: KP274854). The annotation is based on BLASTP (NCBI) homology search of translated genes predicted by FGENESB.

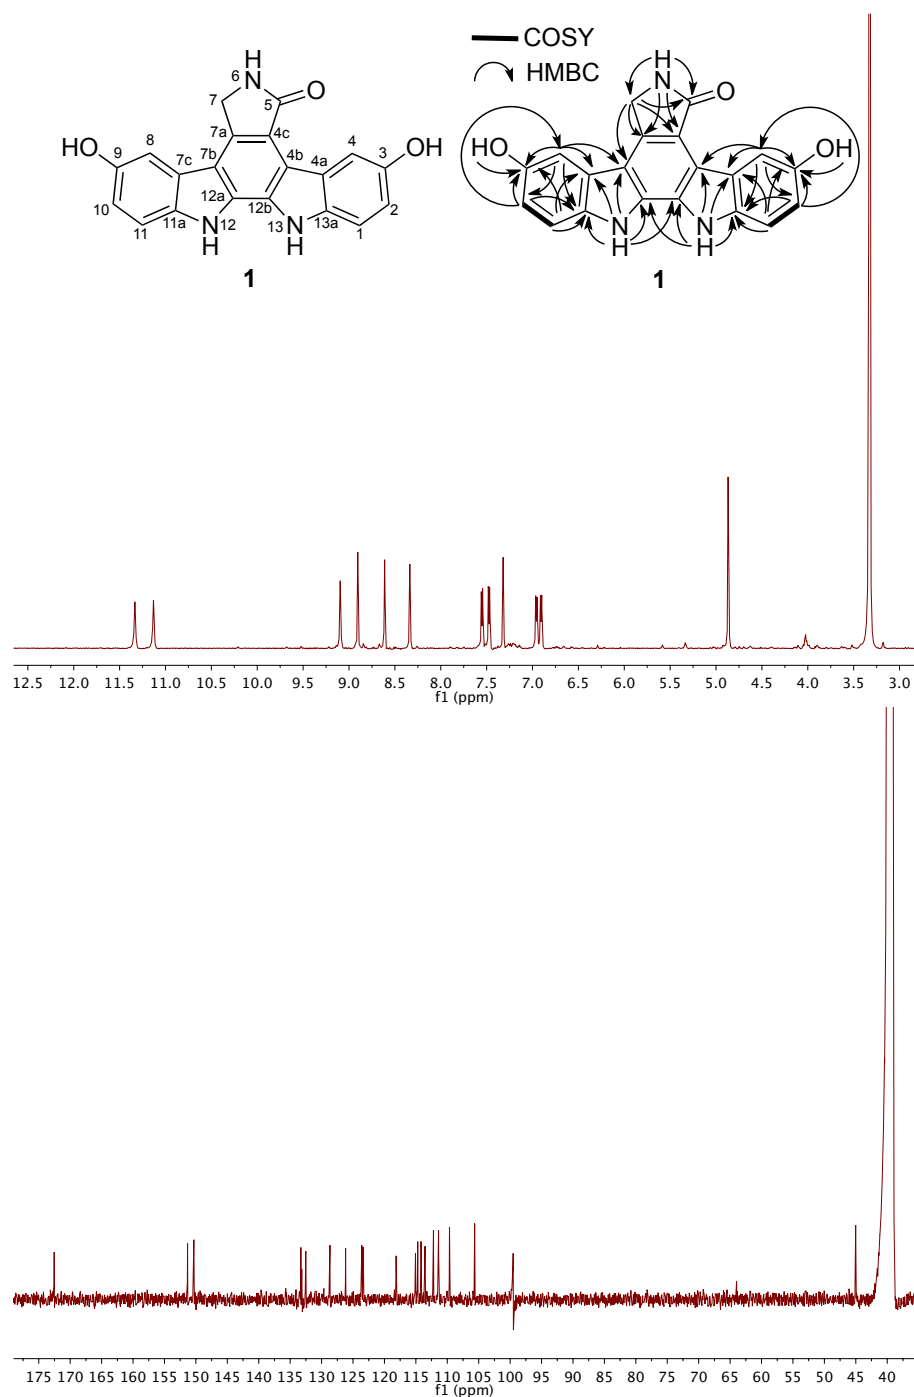

**Figure S4.** NMR spectra of compound 1. Numbering scheme (top left), the observed 2-D NMR correlations (top right),  $^1\text{H}$  NMR (top, 600 MHz) and  $^{13}\text{C}$  NMR (bottom, 150 MHz) in  $\text{DMSO-}d_6$ .

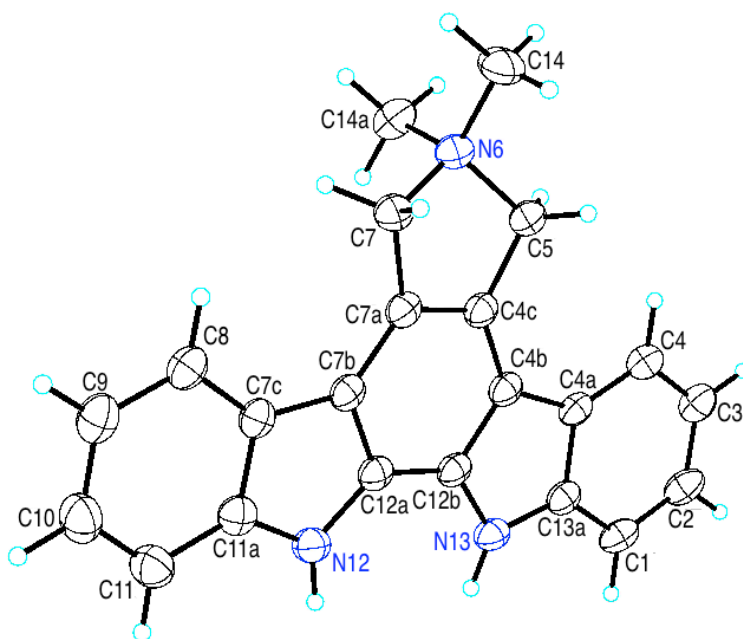

**Figure S5. ORTEP diagram of compound 2.** CCDC deposition number: CCDC 1043291. Formula:  $C_{22}H_{20}N_3^+$ ,  $C_2F_3O_2^-$  (trifluoroacetate salt). Space group: C 2/c. Cell:  $a=28.3226(19)$ ,  $b=10.5984(7)$ ,  $c=16.3567(8)$ ;  $\alpha=90$ ,  $\beta=113.507(3)$ ,  $\gamma=90$ . Temperature: 203 K. Z: 8. R (reflections): 0.0486(3644).

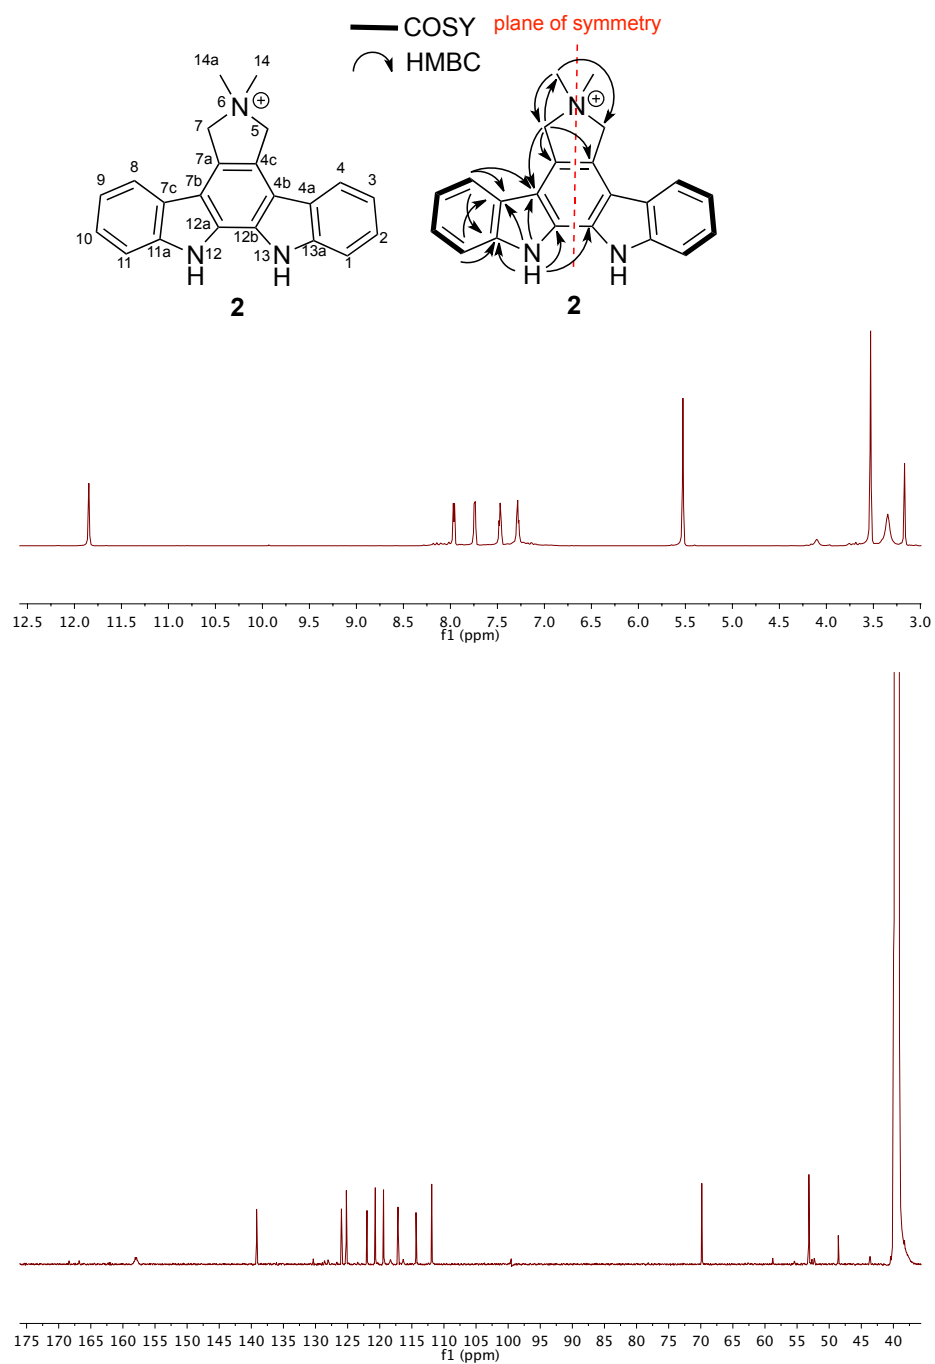

**Figure S6.** NMR spectra of compound **2**. Numbering scheme (**top left**), the observed 2-D NMR correlations (**top right**),  $^1\text{H}$  NMR (**top**, 600 MHz) and  $^{13}\text{C}$  NMR (**bottom**, 150 MHz) in  $\text{DMSO-}d_6$ .

**Table S1. PCR primer list.**

| Name   | Sequence                           |
|--------|------------------------------------|
| StaDVF | GTSATGMTSCAGTACCTSTACGC            |
| StaDVR | YTCVAGCTGRTAGYCSGGRTG              |
| AZ25aF | ACTGGGTCTGTGGAACGAG                |
| AZ25aR | TCCCTTCTCCACGACGAAG                |
| AZ25bF | ACGCTGCATGACGGGATG                 |
| AZ25bR | CCTTCTCCACCAGAAACAGG               |
| EspOF  | GAGACCATGGCAATGAGGTGGGATGAGGCG     |
| EspOR  | GAGAGCGGCCGCCACTCATCACGACACCTCC    |
| EspDF  | GAGACATATGAGTGTTTTTGATCTGCCCC      |
| EspDR  | GAGACAATTGCGTCATTGTTTCGTCTCTCGG    |
| EspPF  | GAGATCATGATCATGACGCAGCGCGGTACA     |
| EspPR  | GAGAAAGCTTCGTTACAGCGGATCGAC        |
| RedOF  | GAGACATATGGCCGAGATCCCACACG         |
| RedOR  | GAGACAATTGCGAATACGCTCATCACGGGG     |
| RedDF  | GAGAACATGTCTATGAGCGTATTCGACCTGCCG  |
| RedDR  | GAGAAAGCTTGCATCACGTACCTTCCGCG      |
| RedPF  | GAGACCATGGCAATGGACCCGTA CTCTTTTACC |
| RedPR  | GAGAAAGCTTGATCTCGAATGTCCGTCACAG    |
| RedMF  | GCGCCCATGGCAATGAGTGACACGTCTCCCG    |
| RedMR  | GCGCAAGCTTGTC ACTTGGTGGCGATCAC     |
| RedEF  | GCGCCATATGGGTGCCAAGGTGACAGT        |
| RedER  | GCGCCAATTGGGTA CT CAGATGGGGCTG     |

(a) Underlined sequences indicate the restriction sites added for ligation.



**Table S2. Tryptophan dimer sequence tag list.**

AZ07a:

GTCATGATGCAGTACCTCTACGCGGCCTACTCGATTCCCACCTACGGCGCGGGCGAAGAGCTGGTGCGGC  
GCGGTGACTGGACGCCAGAGCAGCTGACTCTGATGTGCGGGCAGCGGTGGCGAGACCCGCGAGGGCGGCC  
TGCGGGCGAGCCTGATGGACGTCGCACGCGAGGAGATGATCCACTTCCTGGTCATCAACAACGTGCTGA  
TGGCCACTGGTGAACCGTTCTACGTGCCGGACATCGACTTCGGCACGCTGAACGAGCAGCTGCCGGTGCC  
GCTGGACTTCTGCCTCGAAGCGTTCAACCTCGGCAGCGTGCAGCGGTTTCATCCACATCGAGCAGCCGGAG  
GGCCTCGTGGGCGCGGTCCGGCTGGGCGATCTGCCGTCCTCATCGGACAGTACGACTACGCGTCGCTGA  
GCGAGCTGTACGGGGACATCAGGGAAGGCCTGCAACGGGTTCCGGACCTGTTCTGGTAGACCAGGGCC  
GTGGCGGTGGCGAGCACC GGCTGTTTCATGCGCGAGTCGGTCAACGCCCGGCATCCCGACTACCAGCTCG  
AG

AZ07b:

GTGATGATGCAGTACCTGTACGCAGCGTTCTCAATCCCGACCTACGGTGC CGGCCTGGAATATGTGCGAC  
GCGGCGAGTGGACAGTCAACAGTTGCGGCTGGTATGCGGCAACGGGGGAGAAACACGCGACAAGGGG  
ATACGCAGCAGCCTGCTACCGTAGCACGGGAGGAGATGATCCACTTCCTGATCGTCAACAACATCATC  
ATGGCCATTGGCGAACCATTTACATCCCGGCCATCGACTTCGGCACTATCAACAACCAGCTGCTGGTAC  
CGTTGACTTTTCACTCGAGCGCCTGAACATTGGCAGCGTGGCACGGTTTATCGCCATCGAGCAGCCAGA  
GGGCTCCTCGGTGAGGTCAGGCGTGAGGACATCACAAGAAGTTCGGACTCTCCCGCGGAGGACCACCT  
CTACAGCTCACTTAGCGAGCTTTACGAAACATCCGCGAAGGGCTACAACGCGTCCCGAATATCTTCATG  
GTAGACAAGGGCAGAGGGCGGCGGAGAACATCACCTCTTCTCCGAGAATCGATCAACGCAGTCCATCCC  
GACTACCAGCTGGAG

AZ09a:

GTGATGCTGCAGTACCTCTACGCGGCGTTCTCGATCCCGACTTACGGCGCAGGCGTGGAGTACGTGCGAC  
GCAACGAGTGGACCGCCGACCAGTTGCGGCTGCTATGCGGGCAGCGGGGAGAGACGCGCGACAACGGC  
ATGCGGAGCAGCCTGCTACCGTGGCCCGCGAGGAAATGATCCACTTCCTCCTCGTCAACAACATCATCA  
TGGCCATTGGCGAACCATTCCACATCCCGTCCATCGACTTCGGCACTATCAACAGCCAGCTGCTGGTCCC  
GCTTGACTTCTCGCTCGAACCCTCGGTGTCGGCAGCGTGC GCGGTTTCATCGCCATCGAGCAGCCAAAC  
GATCTCATCGGCGAGGTCAGGCGCGGGGACATCGCGAGCTCGGGACCGCGGGAGGAGAACCACCTCTAC  
AGCTCACTGAGCGAGCTCTACGCGAACATCCGCGAAGGGCTACAACGCGTTCAGATCTCTTCATGGTGG  
ACAAGGGAAGAGGCGGTGGAGAGCACCACCTCTTCTCCGAGAATCGATCAACGCGGTCCATCCCGGCT  
ACCAGCTCGAG

AZ09b:

CGCCAGTGTGATGGATATCTGCAGAATTCGCCCTTGTCATGATGCAGTACCTGTACGCGGCCTACTCGGT  
GCCACGCACGGCGCTGGCTTGAGTACGTGCGCCTGGGTCTGTGGA ACTCCAGGCAGCTCGCTGTGGCC  
TGCGGTGACGGCGGTGAGTCGCTGGACACCGGAATCCGCACCACGTTGCTGTCCATAGCGCGCGAGGAG  
ATGATGCATTTCTGATGGTCAACAACGTCCTGATGGCCATCGGAGAACCGTTACGGTGCCGCGGATCG  
ACTTCGGCACGATCAACGACGAGTTGCCGGTGGCGCTGGATTTCTCCCTCGAGGGACTGGGGCTTGGTAG  
CGTCCAGCGTTTCATCGGATCGAGCAGCCGAGAACGCGGTCGGCGATGTCCAGCTCGGGACGTTGAT  
GGCGACGAGAACCAGCCGCTTGC GAATTATGCCGGGCTGAGCGAGCTGTACGGCGATATCCGCGACGG  
GCTCGAGCGGATTCCGGGCCTTTCGTGGTTCGAGAAGGGACGCGGGCGGCGAGCACCATCTGTTCT  
GCGTCGCTCCATCGACCTGGACCACCGGGCTACCAGCTTGAAAAGGGCGAATTCCAGCACACTGGCGG  
CC

AZ15a:

GTCATGATGCAGTACCTGTACGCGGCGTTTTCGATCCCGACCTATGGTGCAGGTGGGGAGTATGTGCGCC  
GTGGCGAGTGGACGCCGAGCAGTTACAGCTGGTCTGCGGGCAGCGGTGGAGAAACGCGCGACAACGGC  
ATGCGAGGCAGCTTGCTACTGTGGCGCGGAGGAAATGATCCACTTCTGGTCGTCAACAACATCATCA  
TGCGGATTGGTGAACCGTTCTACGTTCCAGCCATCGACTTCGGCACCATCAACCACCAGCTACCGGTTCC  
GCTGGATTTCTCGCTTGAGCCCTTGGTCTCGGCAGTGTGCAGCGCTTCATCGCCATCGAGCAGCCTGAG  
GGTCTCGTGGTGGTCAAGCGTGGCGGCATCGT GAGTACGGGGTCCGGGCGAGGAGA ACTACCCCTAC  
AGCTCACTGAGCGAGCTTACGGGAGCATCCGCGAGGGTCTGCAACGCGTCCCGGATCTCTTCATGGTGC  
ACAAGGGCAGAGGCGGAGGAGAGCATCACCTCTTCTGCCAGAGTCGATCAACACGGTTCATCCCGGCT  
ACCAGCTGGAG

AZ15b:

GATCCAGTACCTGTACGCCGCTACTCGGTGCCACGCACGGCGCCGGGCTGGAGTACGTGCGACTGGG  
TCTCTGGAACGCCAGCAGCTGGCCGTGGCCTGCGGTGACGGCGGTGAGTCGCTGGACACCGGCATCCG  
CACCACGTTGCTGTCCATAGCCCGCAGGAGATGATGCACTTCTTGATGGTCAACAACGTCCTGATGGCC  
ATCGGGGAACCTTTCACGGTGCCGCGGATCGACTTCGGCACGATCAACGACGAGCTGCCGGTTGCGCTG  
GACTTCGCACTCGAGGGGCTGGGGCTCGGCAGCGTCCAGAGGTTTCATCGAGATCGAGAAGCCCGAGAGT  
GCGGTGCGCGATGTACATCTCGGTGACGTCAGGGCGACCGGACCCCGGCCGCTTCAGTTATGCCTCGC  
TGAGCGAGCTGTACGGCGATATCCGCGACGAGCTCCGGAGAGTTCCGGGCTCTTCGTCGTGGAGAAGG  
GACGCGGCGGCGGAGCACCCTTGTTCCTGCGCCGCTCCATCGACATGGATCACCCCGGCTACCAGCT  
TGAG

AZ19a:

GCGGCCGCCAGTGTGATGGATATCTGCAGAAATTCGCCCTTGCACTACCTGTACGCGGCCTACTCGGTGCC  
CACCTACGGCGCCGGCGCCGAGTACGTGCGGCTCGGCCTGTGGACCCCGAGCAGCTCCAGCTCGCCTG  
CGGTGACGGCGGGGAGACCCTCGACGAGGGCATCCGCAGCATGCTGCTCGGCATCGCGCGGGAGGAGAT  
GGTCCACTTCTGCTCGTCAACAACATCATCATGGCGCTGGGCGAGCCGTTCCACGTGCCGCGGATCGAC  
TTCGCCACCGTCAACCACGAGCTGCCGGTACCGCTCGACTTCGCCCTGGAGCGGTGAACCTCGGCAGCG  
TGGAGCGTTACCCAGATCGAGAAGCCGGAGCACCAGGTCAGCCACCTGCGCTCCCGTGACGGCGGCA  
GCGCGGAGCCGCACGCCGGGCACGGGTACGCCTCGCTCAGCGAGCTGTACGCCGACATCCGCGAGGCC  
TCGAACGATTCCCGGCTCTTCCTCGTGGAGAAGGGCAGGGGCGGCGGTGAGCACCACCTGTTCTCCG  
CGAGTCGATCAACCACGAGCATCCCGGCTACCAGCTGGAGAAGGGCGAAATTCAGCACACTGGCGGCCG

AZ19b:

GCAGTACCTCTACGCGGCATGGTCCATCCCCACGTCCGGCGCCGGCGCCGAGTACGTGCGCCGCGGTGA  
GTGGACCCCGCGGCAGCTGCGCCTGGTGTGCGGGGACGGCGGCTCCACTCTAGACTACGGCATCCGCGG  
GATGCTGCTCGACGTGGCCCCGCGAGGAGATGATCCATTTCTGGTTCATCAACAACATCATCATGGCCATC  
GGCGAGCCGTTCCACCTGCCGGCCATCGACTTCGGCACGATCAACGAGCAGATACCGGTCCCGCTCGACT  
TCTGCCTGGAGGGCTTCGGCATCGGCGCCGTCGCGCGGTTTCATCGCCATCGAACGGCCGGATCACCTCAC  
CGTCGAGCTGAGCGGGGACGGGTCCGCACCGGCCGGGAGCGGTGAGGCGCCTTATCCGTACGGCTCGCT  
CAGCCAGCTCTACGCGGCGATTTCGCGAGGCAGTGCAACGGATCCCGGACCTCTTCCTGGTCCGCAAGGG  
CCGTGGCGGTGGCGAGCACCACCTGTTTCATGCGGGAGTCGGTCAACGCGGTGCACCCCGGCTACCAGCT  
GGAAAAGGGCGAAATTCAGCACACTGGCGGCCG

AZ22a:

GTGATGCTGCAGTACCTGTACGCCGCTACTCGGTGCCACGCACGGCGCCGGGCTGGAGTACGTGCGCC  
TGGGTCTCTGGAACGCCAGCAGCTGGCCGTGGCCTGCGGTGACGGCGGTGAGTCGCTGGACACCGGGA  
TCCGCACCACGTTGCTGTCCATAGCCCGCAGGAGATGATGCATTTCTGATGGTCAACAACGTCCTGAT  
GGCCATCGGGGAACCTTTCACGGTGCCGCGGATCGACTTCGGCACGATCAACGACGAGCTGCCGGTTGC  
GCTGGATTTCTACTCGAGGGGTTGGGGCTCGGCAGCGTCCAGCGCTTCATCGAGATCGAGAAGCCCGA  
GAGTGCAGTTCGGCGACGTCCAGCTCGGTGACCTCATGGCGACGGGACCCCGACCGTCGCTCAATTACGC  
CTCGTTGAGCGAGCTGTACGGCGATATCCGCGACGGGCTCCAGCGAGTTCCAGGACTTTTTGTGCTGGAG  
AAGGGACGGGGCGGCGGTGAGCACCCTTGTTCCTGCGCCGCTCCATCGACCTGGATCACCCGGACTAC  
CAGCT

AZ22b:

GTGATGCTCCAGTACCTGTACGCCGCCACTCGATCCCGACGTACGGTGCCGGGCAGGAGCATGTGCGTC  
GCGGGCTGTGGACACCGGAGCAGCTCACGCTGACCTGCGGCGACGGCGGCCAGACCAGGCCGCGCGGA  
ATCCGTGGCACCTGCTGTCCGCTGCCCCGTGAGGAAATGATCCACTTCTTGCTGATCAACAACATCATCA  
TGCGCATGGGTGAGCCGTTCTTCGTGCCGGCCGTCGACTTCGGCACGGTCAACAACACCCTGCCACTGCC  
GCTGGACCTCGCCCTGGAGCAGTTCGGCATAGCCAGCGTCCAGCGGTTTCATCGCGATCGAACAGCCGCA  
CACCCAGATCGGTGAGATCAGCGTCGGCACGGATCCGGGACTGTGCGAGCCGCTGTGCGAGCCGACACA  
TACATACGGTTTCGCTCAGCGGCCTGTACGCCGACATCCGGGAAGGACTGCAGCGGGTGCCGGACCTGTT  
CATGGTGAAGAAGGGCCGTGGCGGAGGCGAGCACCACCTGTTCTCCGTGAGGGCGTCAACGCGGTCCA  
CCCGGACTACCAGC

AZ25a:

GTGATGCTGCAGTACCTGTACGCCGCTACTCGGTGCCACGCATGGCGCCGGGCTGGAGTACGTGCGAC

TGGGTCTGTGGAACGAGCAGCAACTGGCCGTGGCCTGCGGTGACGGCGGTGAGTCGCTGGACACCGGCA  
TCCGACCACGCTGCTGTCCATAGCCCGGAGGAGATGATGCATTTCTGATGGTCAACAACGTCCTGAT  
GGCCATCGGAGAACCGTTCACGGTGCCGCGGATCGACTTCGGCACGATCAACGACGAGTTGCCGATCGC  
GCTGGAGTTCTACTCGAGGGGCTGGGGCTCGGCAGCGTCCAAAGGTTTCATCGAGATCGAGAAGCCCGA  
GAGTGCGGTCGGCGATGTACATCTCGGCGACGTCAGGGCGACCGGACTCCGGCCCGCTTCAGTTATGC  
CTCGCTGAGCGAGCTGTACGGCGATATCCGCGACGGGCTCCGGAGAGTTCCGGGCCCTTTCGTCGTGGAG  
AAGGGACGCGGCGGGCGGAGCACCCTTGTTCCTGCGCCGCTCCATCGACATGGATCACCCGGACTAC  
CAG

AZ25b:

CTCCAGTACCTGTACGCGGCCTTCTCCGTACCGACCCACGGGGCAGGGCTCACGTACGTGCGCCGGGGCC  
AGTGGACGGCGGCGCAGCTGGAACGGCCTGCGGCGGGGGAGGGGCGACGCTGCATGACGGGATGCGT  
GGCAGCCTGCTGACCGTGGCCCGCAGGAGATGATCCACTTCTTGCTGGTGAACAACATCATCATGGCG  
ATGGGGGAGCCGTTCCACGTCCCGGTGATCGACTTCGCCACGCTCAACGAGAAGCTGCCGGTCCCGCTG  
GACTTCGCCCTGGAGCCGCTGAGTGTGCGCAGCGTGCAGCGTTACGTCGCCCTTGAGCAGCCGGCGGCA  
CTACCCCGGAGATCCGGCGGGGGCCCCCGTACCACCCCCAGGAAAGGGCAGCGGGCTTCACCTGGGGGA  
TCGGTCAGCGAACTGTACGCGGGGGTGCGCGAAGGGCTGCAGCGCGTCCCGGACCTGTTTCTGGTGGAG  
AAGGGGCGCGGCGGGCGGTGAACACCATCTTTCTGCGGGAGTCGGTCAACAGGAACCATCCGGACTAT  
CAGCTGGAG

NM1a:

GCCTACTCGATCCCCACGTACGGCGCCGGCCAGGAGCACGTGCGCCGTGGGCTGTGGACCCCCGAACAG  
CTCGCGCTGGTCTGCGGCGACGGCGGGGAGACCACCGCCGGCGGGATCCGTGGCACGTTGCTGTCCGTG  
GCGCGGGAAGAGATGATCCACTTTTTGTTGATCAATAACGTGATCATGGCGATGGGTGAGCCGTTCTTCG  
TGCCGACCGTTCGACTTCGGCACCATCAACAACACCCTGCCACTCCCCCTCGACCTGGCGTTGGAGCAGTT  
CGGCATCGGCAGCGTCCAGCGGTTTCATCGCCATCGAACGCCACCCACGCCAGGACGGCGAGATCCAGAT  
CGGCACCGACCAGGGCAGCGGCGGGCCGCTCGCCGAACCGACCCACACCTACAGCTCGCTCAGTGGCCT  
CTACGCCGACATCCGGGAAGGACTGCAGCGGG

NM1b:

GCGTACTCGGTGCCGGCCTACGGGGCGGGGAGGAGTACGTCCGGCGCGGGCTGTGGACCCCCGAACAG  
CTGCGGCTCGCCTGTGGGGACGGCGGCCGGACCCCGGACGGGGGCATCCGCGGCACGCTGCTCGGCATC  
GCCCCGAGGAAATGATCCACTTCTGATCGTCAACAACATCATCATGGCGATGGGCGAACCGTTCTACG  
TCCCCGACGTTCGACTTCGGCACGATCAACAACACCCTGCCCGTGGCGCTGGACTTCGCCCTGGAGCCCCT  
CGGCGTGGGCAGCGTGCAGCGGTTTCATCGCGATCGAACGCCCGGAGGACCAGGTCGGCGAGCTCCACCC  
CCCGGTCCCGGTTCCGTTCCCCGCCGGCCGGAGCACCCCTACGCCTCGCTCAGCGAGCTGTACGGCGA  
CATCCGCGAGGCCTGCAACGGGTCCCCGACGTC

NM4a:

CTGTGGTCCATCCCCACCTACTCGGCGGGCGCCAGTACGTACGGCGGGGGAGTGGACCCCCGAACAGC  
TCCGGCTGATGTGCGGCGCGGGGCCGACCCGCATCGACGGAGGCGTCCGGCAGCGCCTGTTTCGAGGTGG  
CCAGGGAGGAGATGATCCATTTCTGCTGATCAACAACATCGTCATGGCGACCGGGCAGCCGTTCCACCT  
TCCGGCGATCGACTTCGGCACGTTGAACAACGAGCTGCCGGTCCGCTCGACTTCTGCCTGGAGCCCTTC  
GGACGCGGCGCCCTGGAGCGGTTTCATCGCGCTGGAGCGGCCCTACGACCTGGTCAGGGACATCGCCGGG  
AACGACGCGCCGGCCGGCGGCGGTGCCCGAGGGGCGCGCCCCGTACGGTACGGCTCGCTGAGCGAGCTGT  
ACTCGGCCATCCGCGAAGCCGTCAGGCCATCC

NM4b:

GCCTATTCGGTGCCACCCACCGTGGCCGCTGGAGTACGTGCGGCGGGGCACGTGGACACCCGAGCAG  
CTCCGGCTCGCCTGCGGCGACGGCGGGGAGACCCTAGACGAGGGCATCCGACGATGCTGCTGAACATC  
GCCCCGAGGAGATGATCCACTTCTCCTCGTCAACAACATCCTCACCGCGGTGGGCGAGCCGTTCCACG  
TGCCCCGCTCGACTTCGGCACCGTCAACCACGAGCTGCCGGTACCCTGGACTTCTCCCTGGAGAGGCT  
GGGGCCCCGCGACGTCGAACGGTTCGTGCAGATCGAACGGCCGGAAGACCTCGTCCACGACGTACGGCG  
GGGCGACACCCGGCGGCCCGCCCGACGACCGGCACCCCGTACGCCTCGCTGAGCGAGCTGT  
ACACGGACATCCGCGAGGGCCTGCACCGCGTCCC

NM8a:

GCCTACTCGGTACCCACCCACGGCGCCGGCGCGGAGTACGTACGCCGGGGCCTGTGGACGCCCGACCAA  
CTGCGGCTCGCGTGCAGTACGGCGGGGAGACCCTCGACGAGGGCATCCGCAGCATGCTGCTGACCATC  
GCCCCGAGGAGATGATCCACTTCCTCCTCGTCAACAACATCCTCATGGCGGTGGGCGAACCCTTCCACG  
CGCCCCGATCGACTTCGGCACCGTCAACCGACAGCTGGCCGTCCCGTGGACTTCGCCCTGGAGCGCCT  
GGGGCCCGCAGCGTGGAGCGGTTCTGACAGATCGAACGCCCGAGGACCTCGTCGACGAGGTACGGCG  
CGGCGACGCTCCGGCGCCCCCGCCGCTACGACGAGCGGCACCCGTACGCTCGCTGAGCGAGCTGTAC  
GCGGACATCCGGGAAGGGCTGGAGAGCATCCCG

NM8b:

GCGTACTCGGTCCCGGCGCACGGCGCCGGCCAGGAGTACGTCCGCACCGGCGACTGGACCGAGGAACAG  
CTCCGGACCGCCTGCGGTGACGGGGGAGAGACGCTCGACGGCGGCATCCGGGGCGTCTGGTCCGGGTC  
GCGCGCAGGAGATGATCCATTTCTGGCGGTCAACAACATCCTCACGGCCATCGGTGAGCCGTTCCACG  
TCCCGACGTCGACTTCGGCACCCCTGAACGCGACACTGCCCGTCCACTGGACCTCTGCCTGGAACGCCT  
GAACCTCGCCAGCGTCGAGCGGTTCTGTCGAGATCGAGCGGCCCGAGGGCCTGACCGGCGACGTGCGGCT  
GGGGGAGCGGGCGGGGCGCGGTGAGCTCGACCGGCACACCTACTCGTCGATCAGCGAGCTGTACGGCGA  
CATCAGGCAGGGCCTGCAGGACATCCCGG

NM14a:

CTGTGGTCCATCCCCACCCACTCGGCCGGGATCGAGTACGTGCGGCGACGCGAGTGGACGCCCGGGCAG  
CTCCGGCTCATGTGCGGCGAGGGCCCGCACAGCCTCGACGGCGGCGTCCGGCAGGACCTGTTCGCCGTC  
GCCCGCAGGAAATGATCCACTTCCTGCTGATAAACAACATCATCATGGCCATGGGGGAGCCGTTCCACC  
TGCCCCGATCGACTTCGGCACAGTGAACGGCGAGCTCCCGTCCCATCGACCTGTGCCTGGAGCCCTTCG  
GGCGGGCAGCTGCAACGGTTCGCCGCGCTGGAACGGCCCTACGATCTGGTCCGCGACCTCGCCGCCGA  
CCGGCCACCGGTGACCGCGTGCACCCGTATCCCTACGGTTCGCTCAGCGAGCTGTACAAGGCCATCCCG  
CAGGCGATCCAGGGACATCCCGGACGT

NM14b:

GCGTACTCCATCCCGACCCACGGCGCCGGGGTTCGAGCACGTCCGCCGCGGCCTGTGGACCCCGCAGCAG  
CTGGAGCTGGCCTGCGGCGACGGCGGCCACCACCGCCGGCGGGTTCGCGGCATGCTGCTCGGTGTG  
GCCCGCAGGAGATGATCCACTTCCTGCTGGTCAACAACATCATCATGGCCATGGGGGAGCCGTTCCAC  
GTGCCGGTGGTTCGACTTCGGCACCGCCAACACCACCCTGCCGGTGGCGCTGGACGTCAGCCTGGAGGGC  
CTAACCTCGGCAGCGTCCAGCGGTTTCATCGCCATCGAGCGGCCGGACTGCGAGGTGCGCGAGCTGCGC  
CGGGCGCCGGGACCGGAGACCCGCTCGCCGCGCCGGCCGGTTCGCCGCGCTGCTACGGCACCGTCAGC  
GAGCTGTAACGCCGAGACGTCCGGGGAGGGCC

NM18a:

GCGTACTCGGTGCCGACCCACGGCGCCGGGGCCGAGCTCGTCCGGCGCGGCCGGTGGACGCCCGAGCAG  
CACCGGCTGGCCTGCGGCGACGGCGGTGAGACCACCGACGCCGGGGTTCGCGGCATGCTGCTGTCGGTG  
GCCCGGAGGAGATGATCCACTTCCTGCTGATCAACAACATCATCATGGCCATGGGTGAGCCGTTCCACG  
TGCCGGTGGTTCGACTTCGGCACCATCAACACCACCCTGCCGGTGGCGCTGGACGTCAGCCTGGAGGGCCT  
GAACGTCGGCAGTGTGACGCGGTTTCATCGCGATCGAACGCCCGACACCAGATCGGCGAGCTGCACCCG  
GCGGCCGGTACCGGCTACCCACCGGTCGTCGACCCGACCCGACCGCCGCGCAGCTACGGCACCCCTCCAG  
CGAGCTGTACGCCGAGACTCCGCGACGGGCT

NM18b:

GCCTGGTTCGATCCCGACGGCCGGCGCCGCCGAGTTCGTCCGCCGCGGCGAATGGACGCCCGGAGCAG  
CTGCGGCTGGCGTGCAGGCGACGGCGGACCCACCCTCGACTACGGGATGCGCGGCACGCTGCTCAACGTG  
GCCCGCAGGAAATGATCCACTTCCTGGTTCATCAACAACATCATCACCGCGACCGGCGACGCGTTCCAC  
GTGCCGGCGATCGACTTCGGCACCCCTCAACGAGCAGCTGCCGGTGGCGCTGGACTTCAGCCTGGAGGGC  
TTCGGGCTGGGGCCGCTGCAACGCTTCATCGCCATCGAACGGCCGGACGACCAGACCGTCGAGTTCGCC  
GGACCGACACGCTGCTCGACCGGGGCGACGCGCTGTACCCGTACGGCTCGCTCAGCGAGCTCTACGCG  
GCCATCCCGCAGGGGCCATTCCAGCCGGGT

NM19a:

GCGTACTCGGTGCCGACGTACGCGGCGGCCGAGGCCTTCGTCCACCGCGGTCTGTGGACCCCGAGCAG  
CTGCGGGTTCGCCCTGGGTGACGGCGGAGAGACCCTCGACGGCGGCGTCCGGGGAAAGCTGGTGGAGATC

GCGCGGAGGAGATGATCCATTTCTCCTCGTCAACAACATCCTCATGGCTCTCGGTGAGCCCTTCTGCG  
TCCCCGCGCTGGACTTCGGCGCGCTCGGCACCGACCTGCCGGTGGCCCTGGACCTGTGCCTCGAAGGGCT  
CGACATCGCCACCGTGGCGCGGTTTCATCGCGATCGAGCAGCCCGCGGTGGGCACGCCGAGGTACGGCG  
ACCCGACCTGCCACCACCAACGGCGCGGGTTCGGGGCCGGTACGAGACGTTGAGCGAGATGTACGC  
GCGGATCCGTCAGGGGCTGCAGGACGTCCCG

NM19b:

GCCTGGTCCATCCCGACGGCCGGTGGCGGGGCGGAACTCGTCCGCCGTGGCGAGTGGACCCCGGAGCAG  
TTGCAGCTGGCCTGCGGGACGGCGGTCCGACGCTCGACTACGGGATGCGCGGCACGCTGCTCAACGTG  
GCCCCGGAGGAGATGATCCACTTCTGGTTCATCAACAACATCATCACCGCCACCGGGGACAGCTTCCAC  
CTGCCGGCGATCGACTTCGGCACCCCTCAACGAGCAGCTGCCGGTGGCCCTGGACTTCAGCCTGGAGGGT  
CGGGATCGGGCCGTTGCAGCGGTTTCATCGCCATCGAGCAGCCGGACGACCTGACCGTCGAGTTCGCCGG  
GACCGACACCCGTGCGTCGACCGGGGCGACGCCATCGTACCCGTACGGCTCGCTCAGCGAGCTGTACGC  
GGCGAGTCCGGGAGGCCGTCCGAGCCGGGGC

NE103a:

GCGTTCTCGATCCCCACCTACGGCGCGGGTTCAGCAGCTGGTGGCGCGGGTACTGGACACCGGAACAG  
CTGCGGCTCATGTGCGGTGACGGGGTGAGACGGCGGACGGCGGCGTGGGGGCGCGCTGCTCGGCGTC  
GCCCCGAGGAGATGATCCACTTCTGGTGGTCAACAACGTCTCGTGGCCATCGGCGAGCCGTTCCACC  
TGCCCGACATCGACTTCGGCACGATCAACGACAACCTCATGGTGGCGCTCGACTTCTCGCTCGAGGCGCT  
CGGGCTCGGCAGCGTACAGCGTTCATCCAGATCGAGCAGCCGGACGGGCTCGTGGCGCCGTGCGGGT  
CGGCGACCTCCCGCCCCGTTGAGTCCGAACAGGACTACGACTACGCCTCGCTCAGCGAACGTGTACGGT  
CGGACGACTACACGGAAGGGGTTAGGTTCGACC

NE103b:

TGTGGTTCGCTGCCGACTACCGTATGGGGCCGCGTGGTCCACCAGGGCGAGTGGACCGAGGACCAGTA  
CACGCTGGTCTGCGGGCGCGGGCCGGCGACGGCTGACGGGGGATCCGGGGCGCTCTGTTTCGGGGTGGC  
CCGAGAGGAGATGATTCATTTCTCGTTCATCAACAACATCATCATGGCCACGGGTACGCCCTTCCACGTG  
CCCGACATCGACTTCTCTCGTCAACGCGCAGATCGACCTGCCGATGGACTTCTGCCTGGAGCGGTTTCG  
GCCTGTCTCGCTGAGCAGTTTCGTCGAGTTTGAAGGCGTTTTCGCTCACCCTCGAGCCAGCGCCGGC  
ACCGGGAGGCCCGCAGCGAAAGGGTGGCCGTTACGGGTCGCTGAGCGAGCTCTACGCGTCGATCCGGGA  
CGCCTCGCCCCGTTCCCGAGGCCTTCT

NE120a:

CTGTGGTCCATCCCCACCCACTCGGCCGGGACCGAGTACGTGCGGCGGGGCGAGTGGACGCCCGGGCAG  
CTCCGGCTCATGTGCGGGACGGCGCCGGAGCCGCGACGGCGGTATCCGGCAGGGCCTGTTTCGCCGTC  
GCCCCGAGGAAATGATCCACTTCTGCTGATCAACAACATCATCATGGCGACCGGCCAGCCGTTCCACC  
TGCCCCGGATCGACTTCGGCACGGTGAACGGCGAACTCCCCGTCCCCTCGACCTGTGCCTGGAGCCCTTC  
GGGCGGGGACGCTGCAACGGTTTCGCCGCGTGGAAACGACCCACGACCTGACCCGCGACCTCGCCGAG  
GACCGGCCGCGGTGACCACGCGGACCCGTACCCCTACGGTTCGCTCAGCGAGCTGTACGCCGCCATCC  
GCCAGGCCGTCCAGGACATCCCGGACGTCTTCC

NE120b:

GCGTACTCGGTCCCGGCCCTACGGGGCGGGGAGGAGTACGTCCGGCGGGGGCTGTGGACCCCCGAGCAGC  
TGCGGCTCGCTGCGGGGACGGCGCCGGAGCCGCGACGGGGGATCCGCGGCACGCTGCTCGGCATCG  
CCCGGAGGAGATGATCCACTTCTGATCGTCAACAACATCATCATGGCGATGGGCGAACCCCTTCCACGT  
CCCCGACGTCGACTTCGGCACGATCAACAACACCCTGCCGGTGGCGTGGACTTCGCCCTGGAGCCCTTC  
GGCGTGGGACGCTCCAGCGGTTTCATCGCGATCGAACGGCCGGAGGACCAGGTCGGCGAGCTCCACCCC  
CCGGTCCGGTACGGCTCCACGCCGGACCCGGGACCCGTACGCCTCGCTCAGCGAGCTGTACGGCGAC  
ATCCGCGAGGGCCTGCAACGGGTCCCCGAGTC

NE123a:

CTGTGGTCCATCCCCACCCACTCGGCCGGGACCGAGTACGTGCGGCGAGGCGAGTGGACGCCCGGGCAG  
CTCCGGCTCATGTGCGGGACGGCGCCGGAGCCGCGACGGCGGCGTCCGGCAGGACCTGTTTCGCCGTC  
GCCCCGAGGAAATGATCCACTTCTGCTGATCAACAACATCATCATGGCGACGGGTTCAGCCGTTCCACC  
TGCCCCGGATCGACTTCGGCACGGTGAACGGCGAGCTCCCCGTCCCCTCGACCTGTGCCTGGAGCCCTTC  
GGGCGGGGACGCTGCAACGGTTTCGCCGCTTGGAAACGGCCCTACGACCTGGTCCGCGACCTGGCCGCC

GACCGGCCACCGGTGACCGCGCGGACCCGTACCCCTACGGTTCGCTCAGCGAGCTGTACGGGGCCATC  
CGCCAGGCGATCCAGGACATCCCGGACGTCTTTC

NE123b:

GCCTGGTCCATCCCGACGGCCGGTGCCGGGGCGGAACTCGTCCGCCGTGGCGAGTGGACCCCGGAGCAG  
TTGCAGCTGGCCTGCGGGACGGCGGTCCGACGCTCGACTACGGGATGCGCGGCACGCTGCTCAACGTG  
GCCCCGGAGGAGATGATCCACTTCTGTCATCAACAACATCATCACCGCCACCGGGGACAGCTTCCAC  
CTGCCGGCGATCGACTTCGGCACCCCTCAACGAGCAGCTGCCGGTGCCCTGGACTTCAGCCTGGAGGGTT  
CGGGATCGGGCCGTTGCAGCGGTTTCATCGCCATCGAGCAGCCGGACGACCTGACCGTCGAGTTCTCCGG  
GACCGACACCCTGCTCGACCGGGGGCGACGCCATGTACCCGTACGGCTCGCTCAGCGAGCTGTACGCGC  
GATCCGGGAGGCATCCGAGCGGGTGCCCGACC

NE125a:

GCCTTCTCCATCCCGGCCTACGGGGCCGGAACCGAGTACGTGCGTTCGTGGTGTGTGGACACCCGGGCAGT  
TGCGGCTCGCTTGTGGCAGTGGCGGCGAGAACCAGGACGACGGCATGCGTGGCGCCCTGCTACCGTGG  
CGCGTGAGGAGATGATCCACTTCTGTTGGTCAACAACATCATCATGGCCACCGGGGAGACGTTCTACGT  
CCCGTCCATCGATTTCCGGACGATCAACAACGAGCTGCCGGTACCGCTGGACTTCTCCCTCGAACC GTTC  
GGGATCGGCAGTGTCCAGCGGTTTCATCGCGATCGAGCAACC CGCGGGCCTGGCCGGGGAGATCCGGCGC  
GGTGACGTCCGGGGTGACGACGCGGAGGTCGCCCGCACCCGTACGGCTCACTCAGCGAGCTCTACGCG  
AGCATCCGGGAAGGTCTGTGCCGGGTGCCCGGT

NE125b:

GCCTACTCCATCCCGACGTACAGCGCGGGCCGGCGGCACGTGCGGCACGGGCTGTGGACGCCGGAGGAG  
CTGTGGCTCGTGTGCGGGACGGCGGCGAGACGACGAGGGTGGCATGCGCGGCAGGCTGCTGACCGTC  
GCCCCGAGGAGATGATCCACTTCTGTCATCAACAACATCATCATGGCGATCGGCGAGCCGTTCTACG  
TGCCCGACGTGACTTCGGCACGGTTCGACGCGGTCCTGCCGGTGCCGCTCGACCTCGCGCTCGAGGCCTT  
CGGCCTGGGCAGCGTGCAGCGGTTTCATCGCCCTCGAGCGGCCCGACGCGCAGGTCGGCGAGGTGCGCCG  
CGCCGGCGCCGCCCGACCGCCGTGTCCGACGGAGCCGGCGCGCACGTA CTCCCCGCCAAGCGCGCGTGT  
ACGCGACCGATCCGGTACGGGGCGGTGAAGGCGC

NE126a:

CTGTGGTCCGTCCCCACCTACTCGGCGGGGGTCCGCCACGTGCGAACCGGGCGAGTGGACGCCGGAGCAG  
CTGCGCCTGATGTGCGGTGCGGGGCCGACGGCCTCGACGGCGGGCTCCGGGGGAGCCTGCTGGGCGTG  
GCCCCGGAGGAGATGATCCACTTCTGTCATCAACAACCTGATCATGGCGACCGGCCAGCCCTTCCACC  
TGCCCGACATCGACTTCGGCACGGTGAACAGCGTGTGCCCCGTCCCGGTCGACTTCTGCCTGGAGCCGTT  
CGGCATCGCCGCCCTGCAGCGGTTTCATCGCCCTGGAGCGGCCGTACGGCCTGGTCCGGGACTTCGCGGG  
GAGCGGCGGGAACGGCGGGCGGGTTCGGCGACGGCGCGCCGCGAGGGGGAACCGCACCGGTACGGCT  
CGCTGAGCGAGCTGTACGCGGCCATCCGCCGGGCG

NE126b:

GCCTGGTCCGTCCCGACCCACGGCGCGGGCCGGCGAGTACGTGCGCCGGGGCGCCTGGACCCCCCGGAG  
CTCCGGCTCGCCTGCGGGACGGGGGCCGACCGGTGACTACGGCGCGCGCGCCTGCTGCTCGACGTG  
GCCCCGGAAGAGATGATCCACTTCTGTCATCAACAACCTGATCATGGCGACCGGCCAGCCCTTCCACC  
CTGCCCGGATCGACTTCGGCACCCCTCAACGCCGAGCTGCCGATCCCGCTGGACCTCTGCCTGGAGGGGT  
TCGGGATCGGGCGCTGCAACGCTTCATCGCCGTGCAACAGCCCCGACGGGCTGACGCCGGGGCTCGCCG  
GGGACCGGCCGGCGGGCGGGTGGCACCCGTACGGTTCGCTCAGCGAGCTCTACGCCGCGATCCGCG  
AGGCGGTACCCGGATCCCCGACCTGTTCTGTTGTC

NE130a:

GCCTGGTTCGATCCCGCTGTACGGGGCGGGCCGGGAACTGGTACGGCGCGGGGAGTGGAGCGCCCGGAG  
CTCCGCCTGGCGTGCGGCGACGGCGGGGAGACCCTCAGCAACGGCATGCGCGGCAGCCTGATGAACGTG  
GCCCCGGAGGAGATGACGCACTTCTGTCATCAACAACGTCATCACCGCGGGCGGACTTCCCTTCCACC  
TGCCCGGATCGACTTCGGGACCGTCAACAACGGCTGCCGGTGCCGCTCGATGTGAGCCTGGAGGGTTC  
GGGCTGGGCGAGCGTGCAGCGGTTTCATCGCCCTGGAGCAGCCGACGGACTGAGCCCCGACTCGCCGAGG  
AGACCGAGAACGCCGCCCCCGGGACGAGCGGCGACCCGTACCCGTACCGTACCGTACCGTACCGGACCTGTACGC  
CGGATCCGGGAGGGCATCGCCACCATC

NE130b:

GCCTACTCGATCCCGACCCACGGTGCGGCCCCGGGAGTTCGTCCGCCGCGGTCTGTGGACGCCCCGACCAG  
GCCCCGGCTGGCGTGCGGGGACGGCGGCCGCAGCCGCGACGCCGGGGTGCGCGGCCGGCTGCTGGAGGT  
GGCCCGGAAGAGATGATCCACTTCCTCGCCGTCAACAACATCGTCATGGCGATGGGGGAGGCGTTCCA  
CGTCCCCGACATCGCGTTCGGCCGGCTCAACGCCACCCTGCCGGTGGCGATGGACTTCTGCCTGGAACCC  
TTCGGGCTGGGCACCCTCCAGCGGTTTCATCGCGATCGAGCGGCCCTGGACGCGGCACCGCCCCGCTCA  
GCGCGGTGTCCGAGGACCGCCGGCGATGCCGGGACCCCGCCGCTACCAGGGCATCCCGGAGTTGTACG  
AGGAGATCCGGCAGGGCCTGCACCGCGTCCCCGAC
